# Supplementary material
Source: PubMed Central journal article supplement (PMC2140275)
Supplement: NIHMS26566-supplement-1.pdf [file NIHMS26566-supplement-1.pdf]

## Supplementary Figure 1

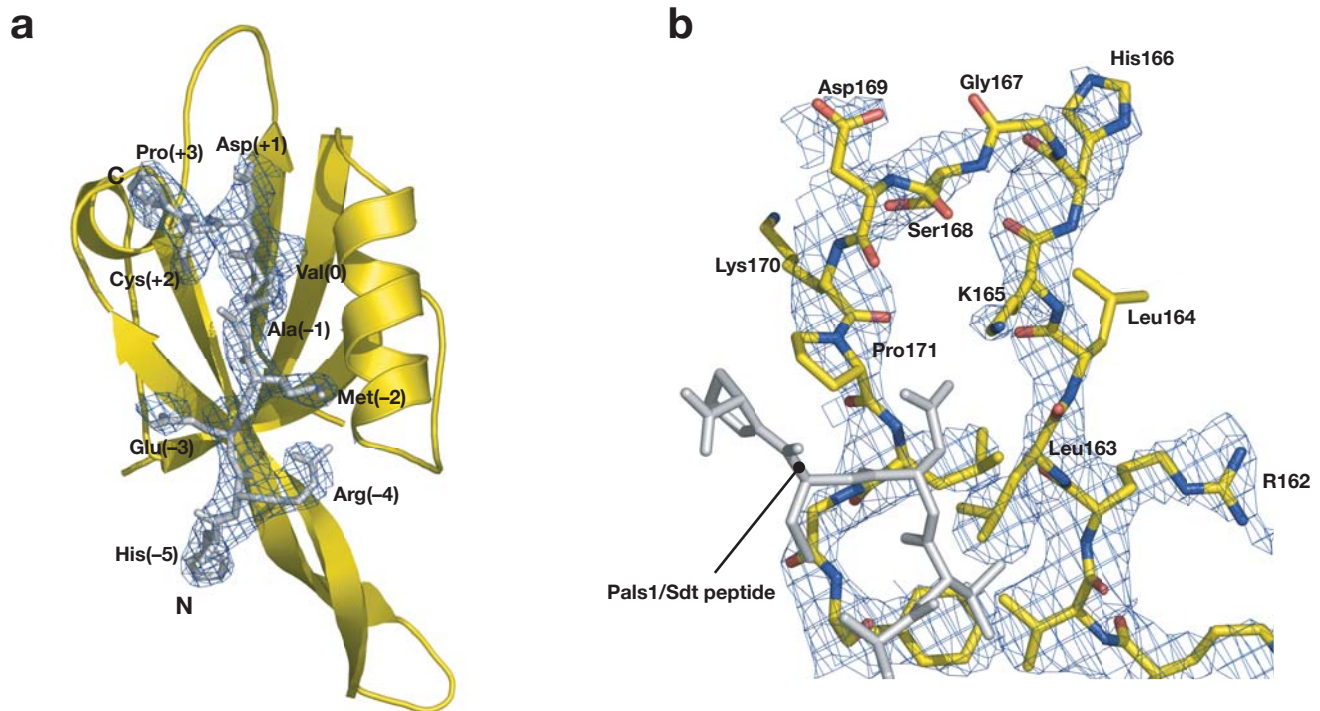

**Supplementary Figure 1** Structure of the Par-6 PDZ in complex with the internal Pals1 ligand. **(a)** Ribbon representations of the Pals1 bound Par-6 PDZ domain. The Pals1 ligand is shown in grey with residues labeled and numbered according to standard PDZ nomenclature (residue zero would be the C-terminal residue). Electron density from a  $2F_o - F_c$  simulated annealing composite omit map contoured at  $1\sigma$  is shown around the peptide. **(b)** The carboxylate-binding loop. Residues 162-171 from the Par-6 PDZ domain which connect the  $\beta 1$  and  $\beta 2$  strands of the Par-6 PDZ domain are shown in stick representation with electron density as in (a). A portion of the Pals1 ligand is shown for orientation.

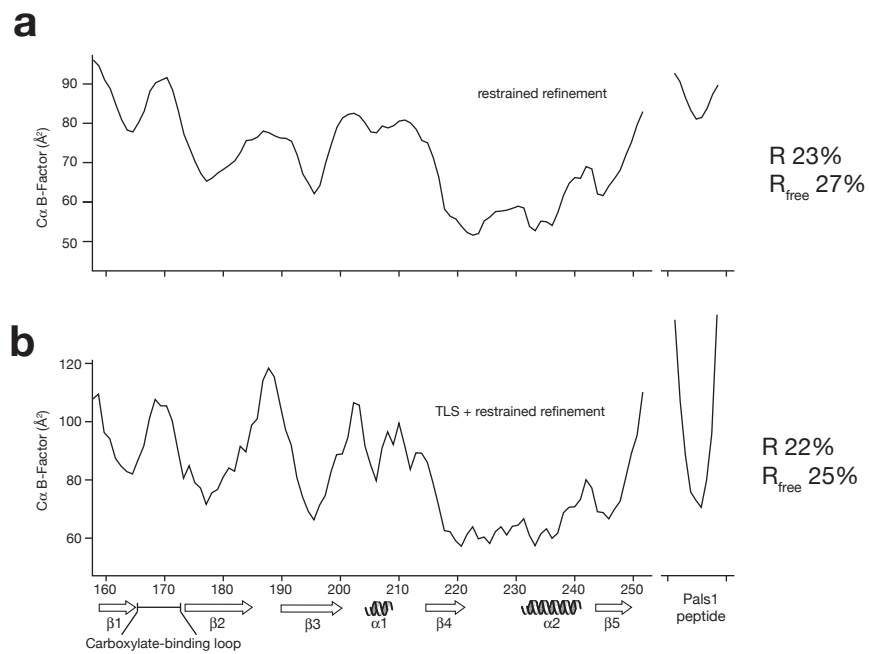

**Supplementary Figure 2** B-factor analysis of the Par-6–Pals1 complex. **(a)** Plot of the alpha carbon isotropic B-factor as a function of residue after restrained refinement. **(b)** Plot of the alpha carbon isotropic B-factor as a function of residue after TLS (translation-libration-screw) and restrained refinement.

### Supplementary Figure 3

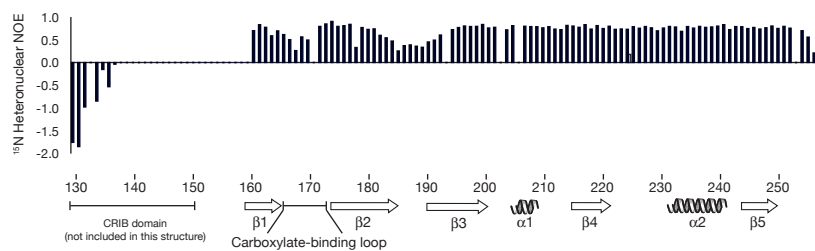

**Supplementary Figure 3** Heteronuclear NOE analysis of the Par-6 CRIB-PDZ fragment bound to the Pals1 peptide. Values of zero are not measured (proline residues or residues that are not yet assigned). The Par-6 CRIB domain is unstructured as shown by its negative NOE values. Although the carboxylate binding loop is more dynamic than the core of the protein, it is still well-ordered.

## Supplementary Figure 4

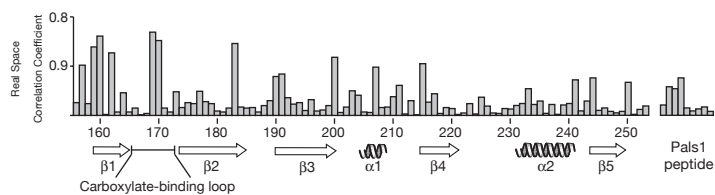

**Supplementary Figure 4** Real space correlation coefficients as a function of residue for the refined model. No residue has a coefficient below 0.8 indicating that the model is well described by the electron density.
